# Supplementary material for: Determining the temporal variability in atmospheric temperature profiles measured using radiosondes and assessment of correction factors for different launch schedules
Source: Copernicus journal article supplement (doi:10.5194/amt-8-463-2015), 2015-01-29

## **Comparison of temperature change rates between radiosonde launches at 6 hour intervals from 3 data sets**

### **Data sets:**

|                                                    |               |
|----------------------------------------------------|---------------|
| Lindenberg 1999 to 2008                            | Visalia RS-90 |
| Lindenberg 2009 to 2012                            | Visalia RS-92 |
| Southern Great Plains Central Facility 2006 – 2012 | Visalia RS-92 |

All times are local time.

The error bars represent the standard error of the mean.

The number of launches per data point:

|                         |     |
|-------------------------|-----|
| Lindenberg 1999 to 2008 | 889 |
| Lindenberg 2009 to 2012 | 227 |
| Southern Great Plains   | 572 |

Key:

Blue line : Lindenberg 1999-2008; Red line : Lindenberg 2009-2012; Green line : Southern Great Plains.

**Winter 00:00 to 06:00**

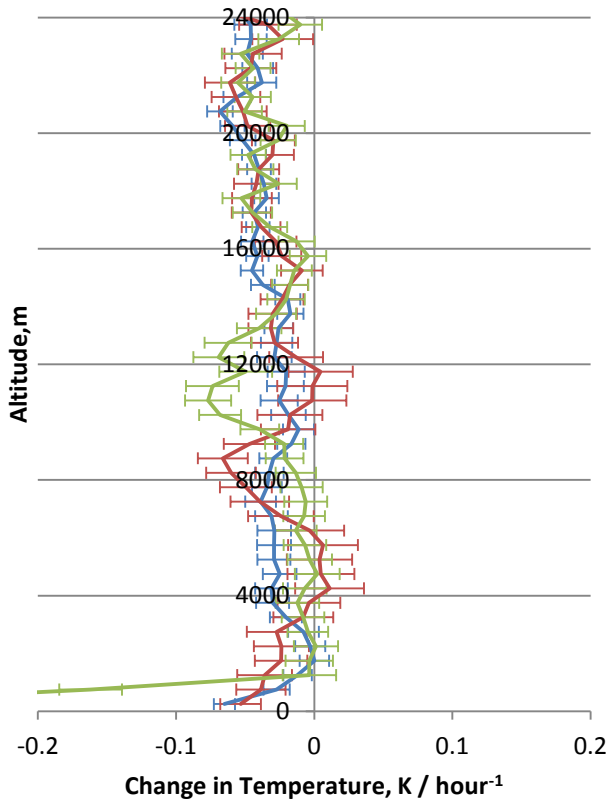

**Winter 06:00 to 12:00**

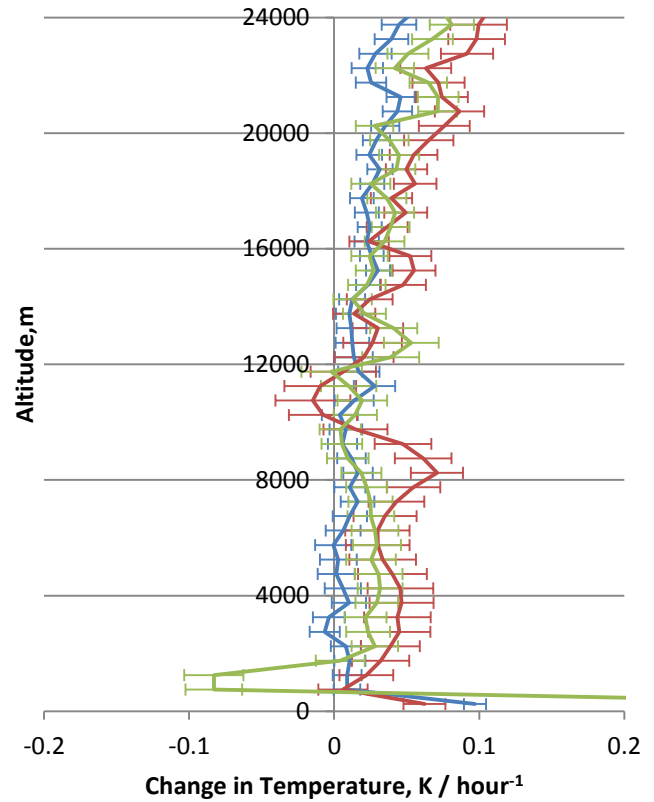

**Winter 12:00 to 18:00**

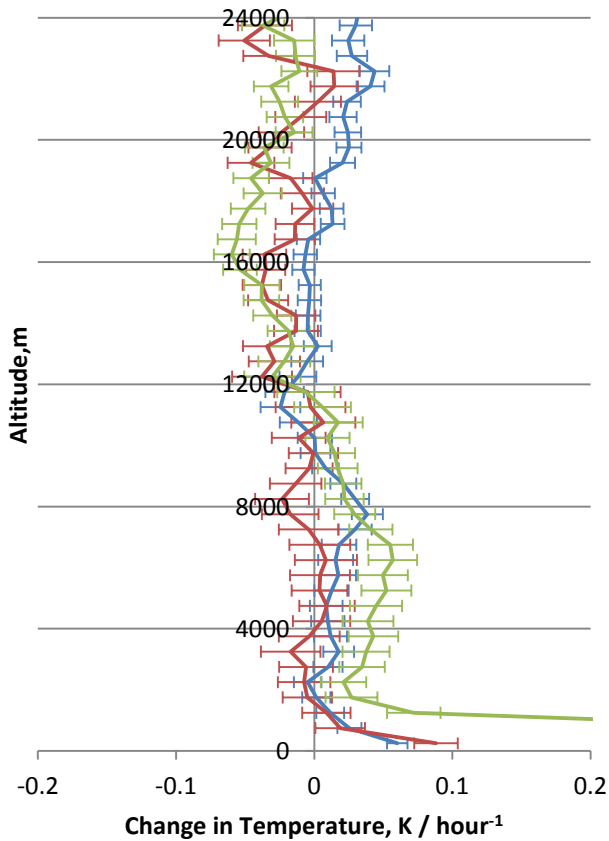

**Winter 18:00 to 00:00**

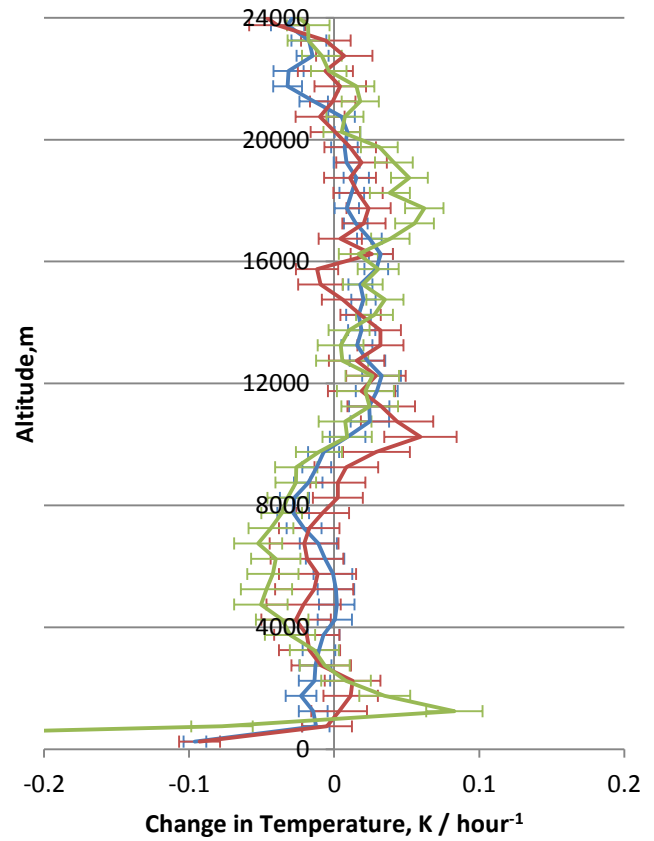

**Spring 00:00 to 06:00**

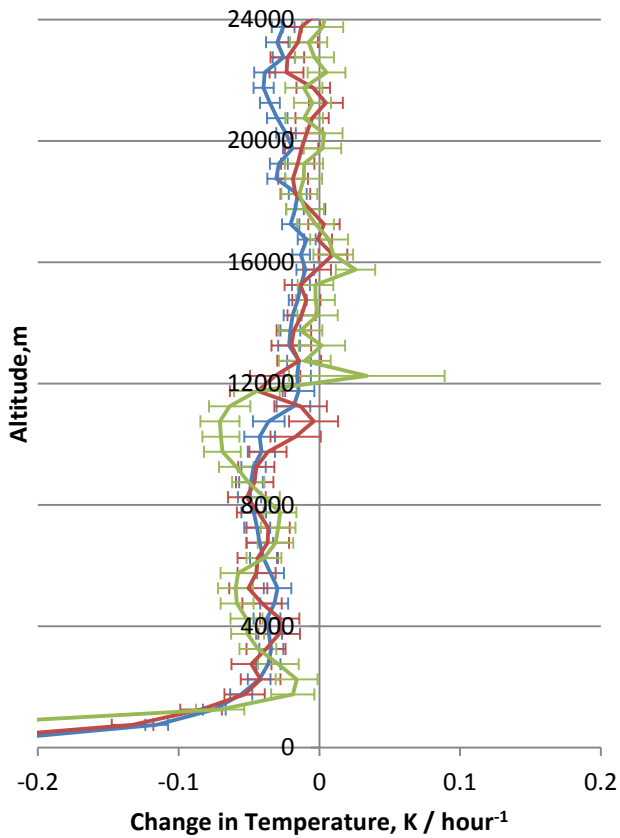

**Spring 06:00 to 12:00**

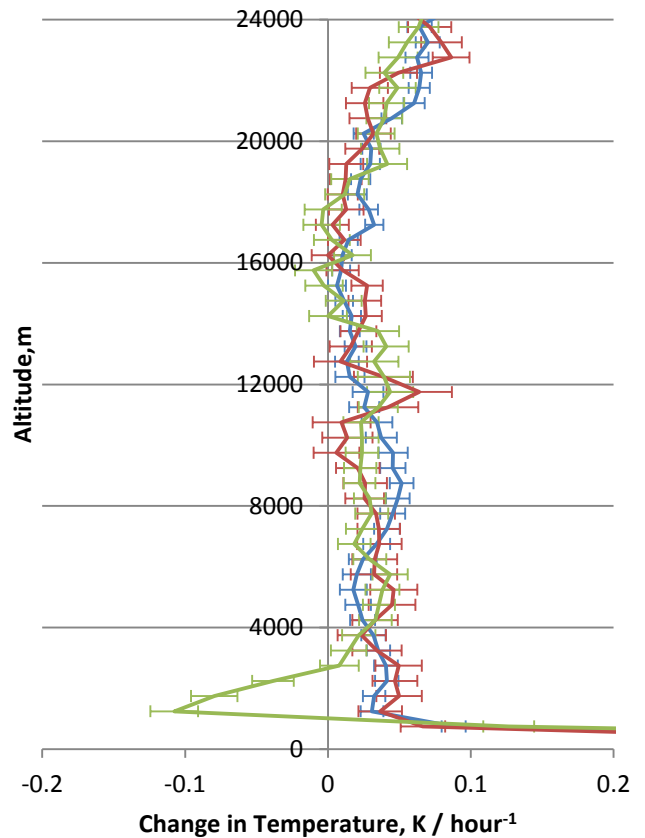

**Spring 12:00 to 18:00**

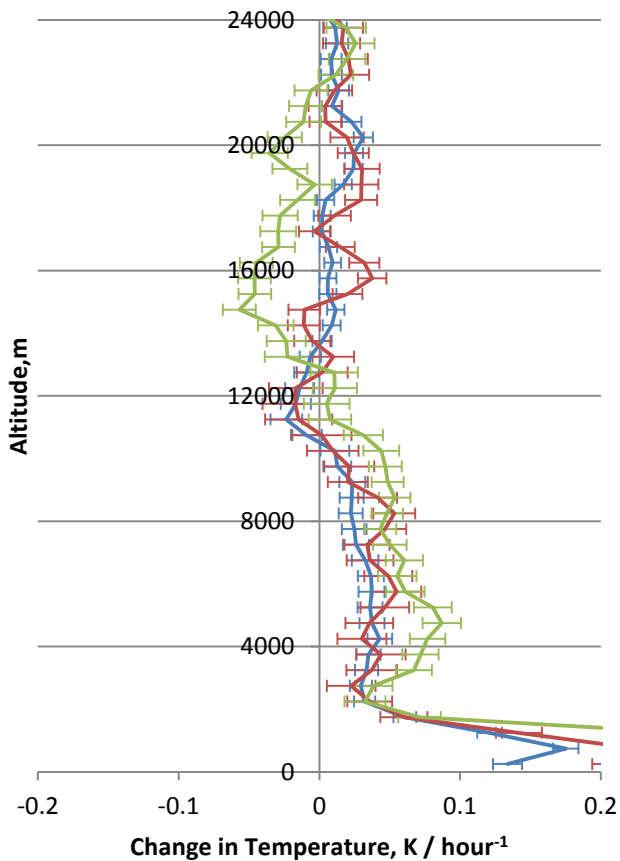

**Spring 18:00 to 00:00**

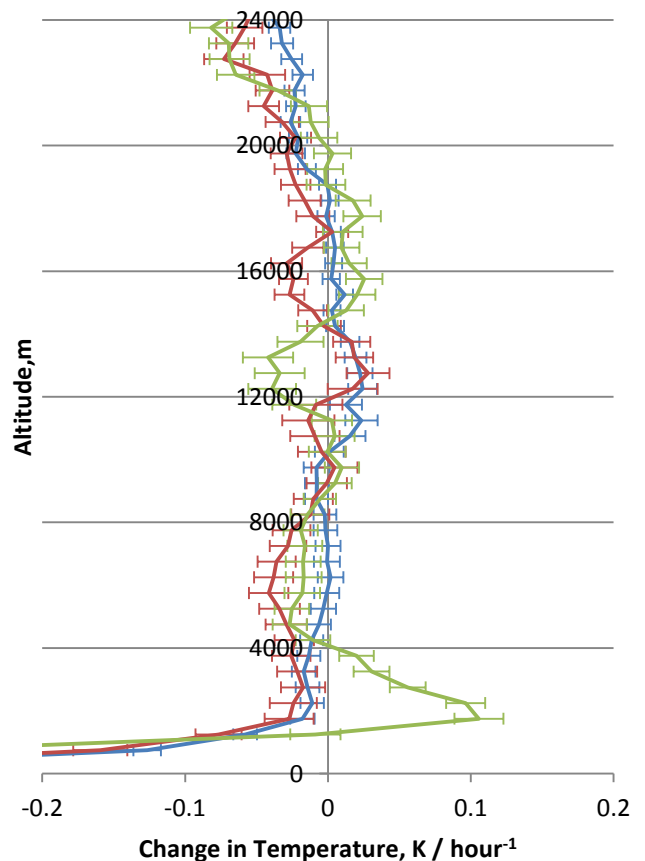

**Summer 00:00 to 06:00**

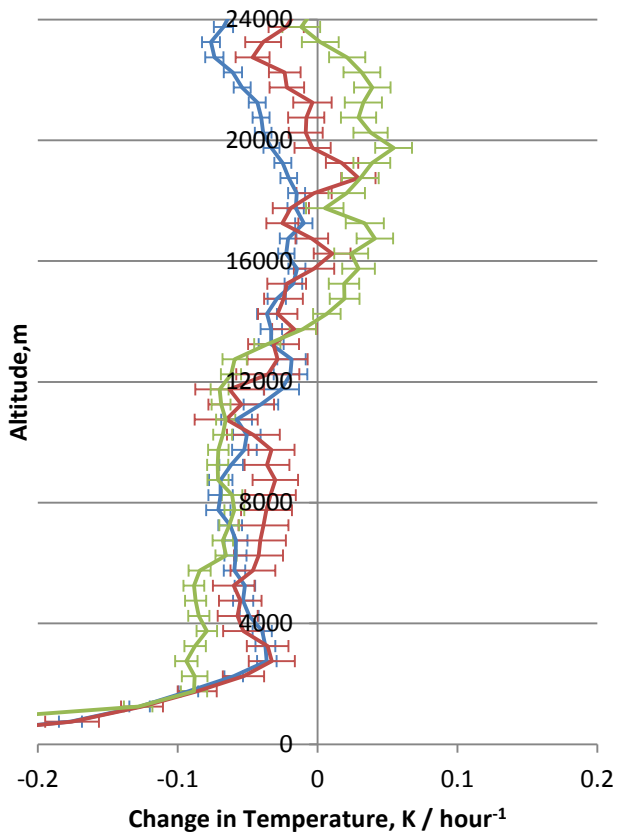

**Summer 06:00 to 12:00**

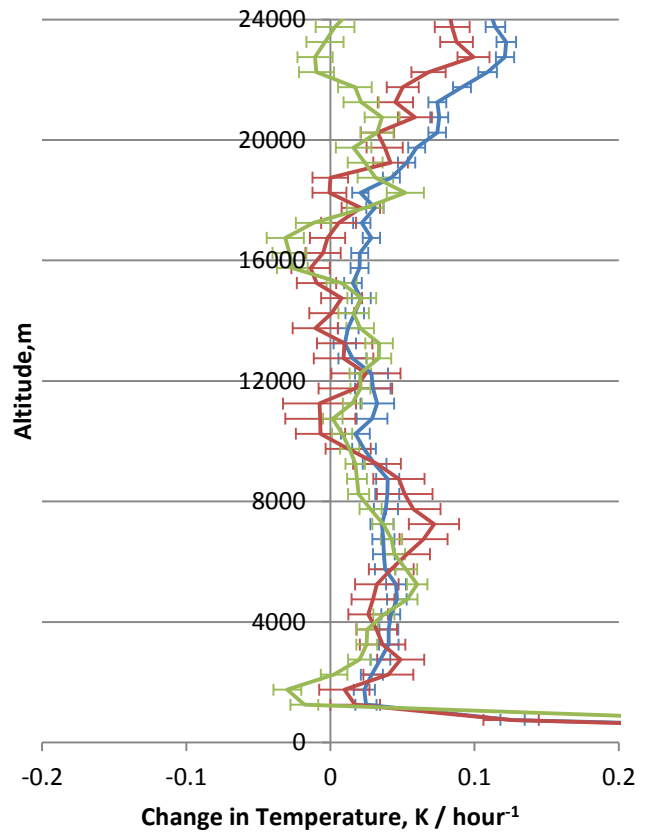

**Summer 12:00 to 18:00**

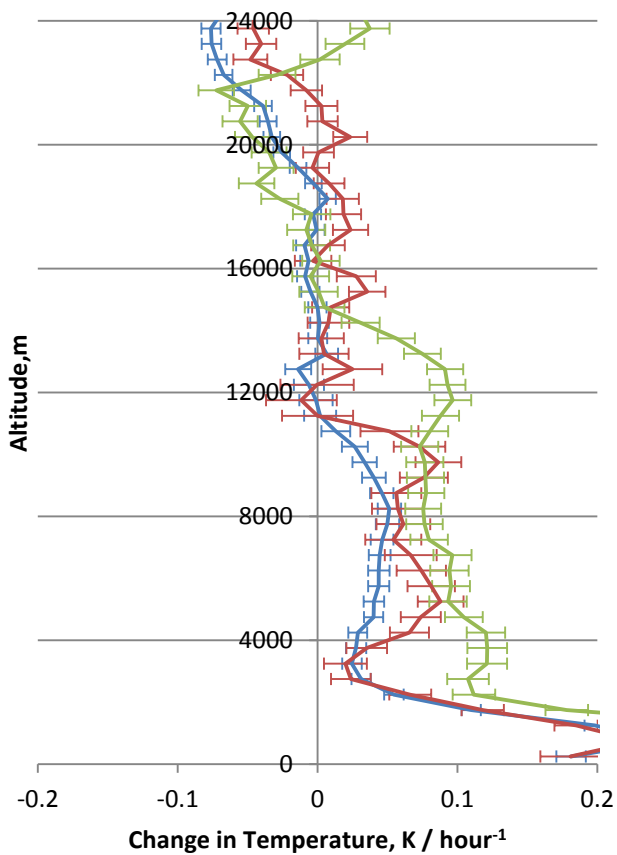

**Summer 18:00 to 00:00**

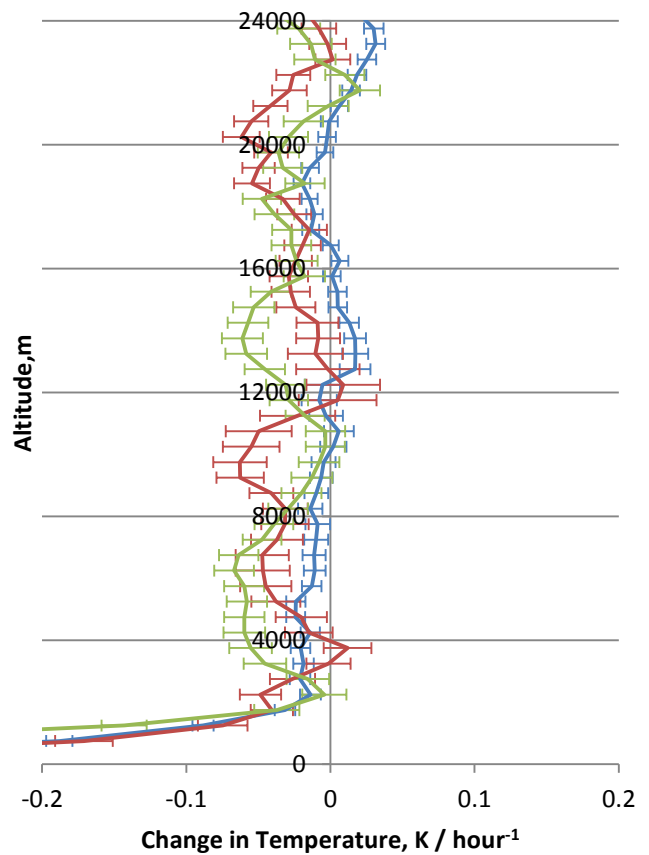

**Autumn 00:00 to 06:00**

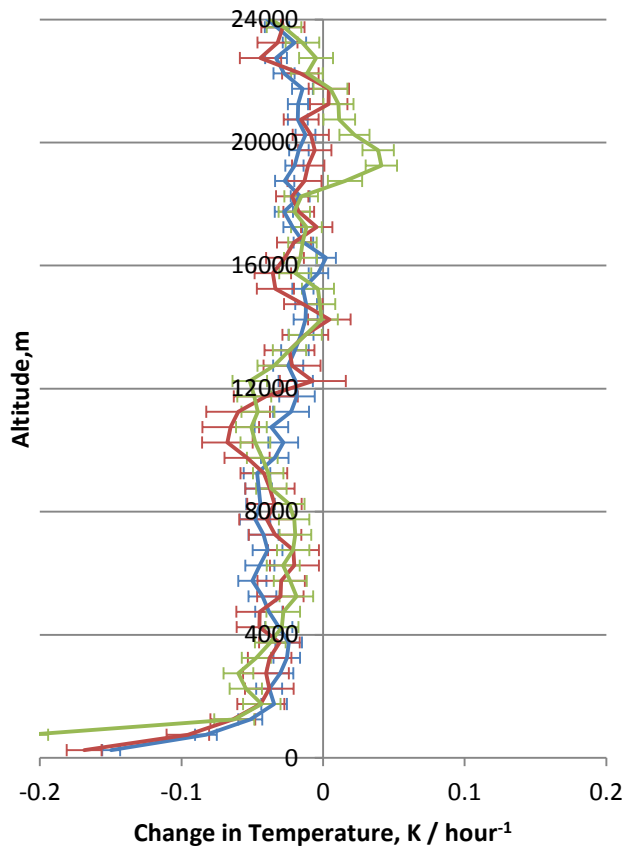

**Autumn 06:00 to 12:00**

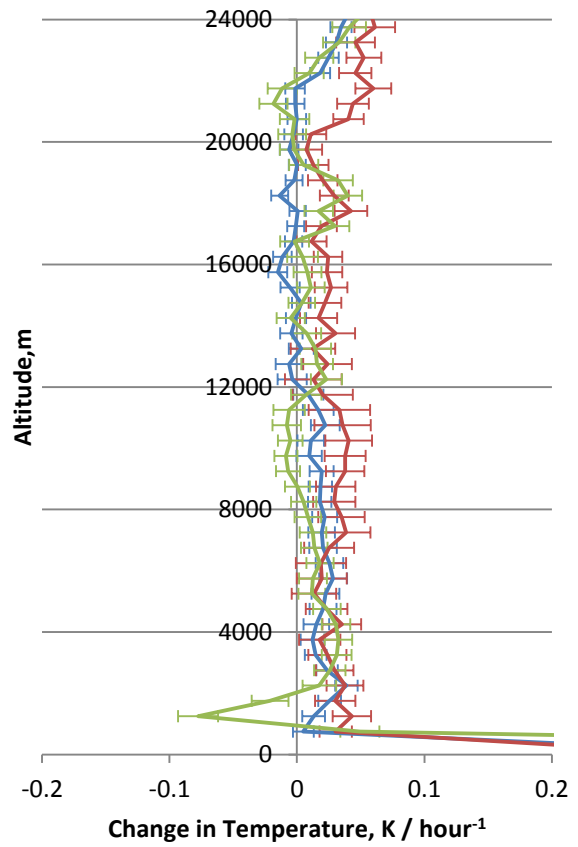

**Autumn 12:00 to 18:00**

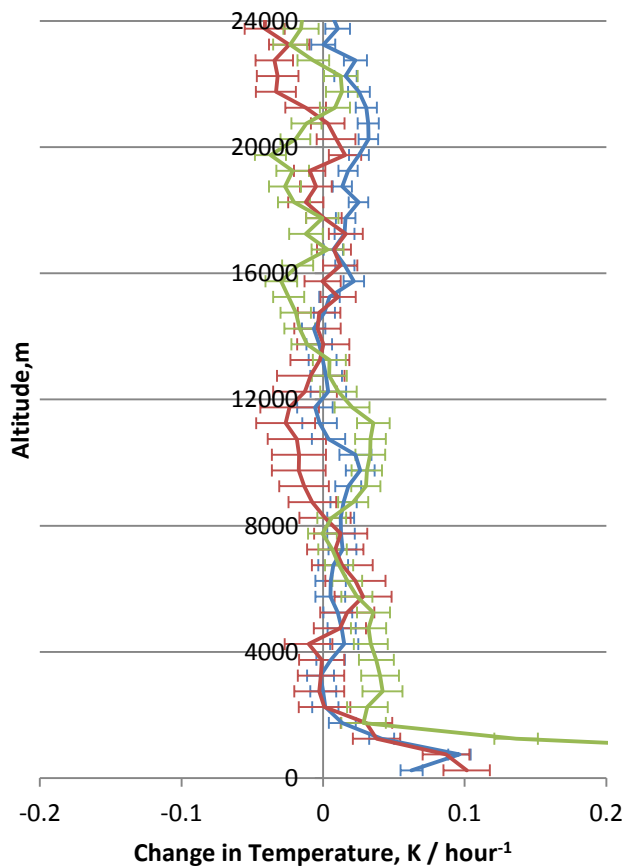

**Autumn 18:00 to 00:00**

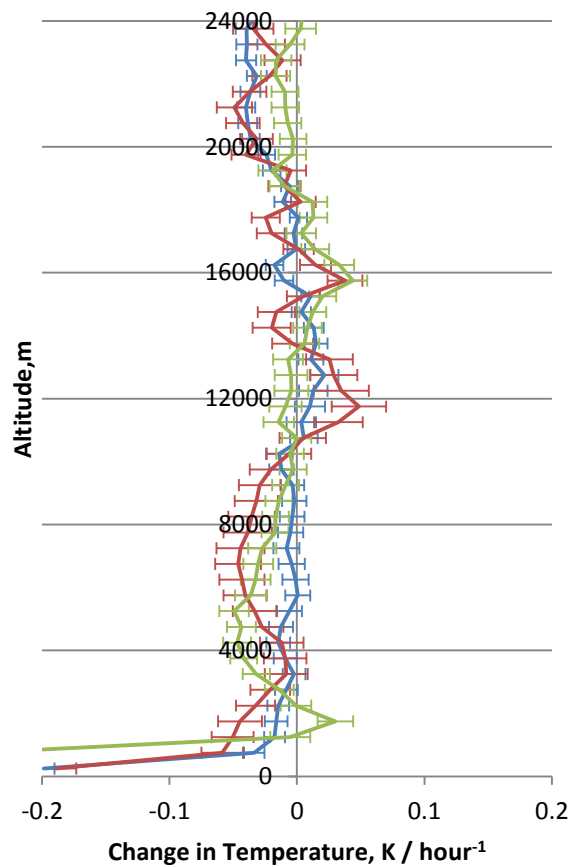

Supplement: Supplementary file 1 [file Complete set of charts for Figures 4 and 5 Final.pdf › Complete set of charts for Figures 4 and 5 Final.pdf]
