# Supplementary material for: Determining the temporal variability in atmospheric temperature profiles measured using radiosondes and assessment of correction factors for different launch schedules
Source: Copernicus journal article supplement (doi:10.5194/amt-8-463-2015), 2015-01-29
Supplement: Supplementary file 1 [file Complete set of charts for Figures 4 and 5 Final.docx]

**Comparison of temperature change rates between radiosonde launches at 6 hour intervals from 3 data sets**

**Data sets:**

Lindenberg 1999 to 2008 Visalia RS-90

Lindenberg 2009 to 2012 Visalia RS-92

Southern Great Plains Central Facility 2006 – 2012 Visalia RS-92

All times are local time.

The error bars represent the standard error of the mean.

The number of launches per data point:

Lindenberg 1999 to 2008 889

Lindenberg 2009 to2012 227

Southern Great Plains 572

Key:

Blue line : Lindenberg 1999-2008; Red line : Lindenberg 2009-2012; Green line : Southern Great Plains.
