# Supplementary material for: Determining the temporal variability in atmospheric temperature profiles measured using radiosondes and assessment of correction factors for different launch schedules
Source: Copernicus journal article supplement (doi:10.5194/amt-8-463-2015), 2015-01-29
Supplement: Supplementary file 2 [file Data for Figure 2 Final.xlsx]

## Sheet: Sheet 1
	Rate of change in temp, Deg K / hour															Standard deviation of the mean
	22:00 - 10:00	10:00 - 22:00	22:00 - 04:00	04:00 - 10:00	10:00 - 16:00	16:00 - 22:00	22:00 - 01:00	01:00 - 04:00	04:00 - 07:00	07:00 - 10:00	10:00 - 13:00	13:00 - 16:00	16:00 - 19:00	19:00 - 22:00		22:00 - 10:00	10:00 - 22:00	22:00 - 04:00	04:00 - 10:00	10:00 - 16:00	16:00 - 22:00	22:00 - 01:00	01:00 - 04:00	04:00 - 07:00	07:00 - 10:00	10:00 - 13:00	13:00 - 16:00	16:00 - 19:00	19:00 - 22:00
	Average	Average	Average	Average	Average	Average	Average	Average	Average	Average	Average	Average	Average	Average		Std of average	Std of average	Std of average	Std of average	Std of average	Std of average	Std of average	Std of average	Std of average	Std of average	Std of average	Std of average	Std of average	Std of average
250	0.0268643	-0.0157673	-0.0687888	0.117455	-0.0308893	-0.00969694	-0.0427966	-0.101082	0.132849	0.112346	0.0486941	-0.0766484	-0.00557007	0.00683559		0.0317312	0.032223	0.0547371	0.058085	0.0388209	0.0313955	0.0252578	0.0417148	0.0540686	0.0312458	0.0241123	0.0321639	0.0226793	0.0253867
750	-0.00549097	0.0113943	-0.0624454	0.0294797	0.0112817	0.00263224	-0.0375581	-0.0908176	0.139829	-0.0171537	0.0254553	-0.00132063	0.0524155	-0.00118518		0.0289259	0.0289305	0.0561931	0.0560205	0.0267942	0.0284346	0.0307607	0.0429377	0.056879	0.0254671	0.0199461	0.0279073	0.0288697	0.0275754
1250	-0.0228753	0.0238393	-0.0588176	0.015755	0.00211983	0.0316071	-0.0293382	-0.10263	0.126312	-0.0516488	0.0122134	-0.00676292	0.0987038	0.0205802		0.033495	0.0381822	0.0477037	0.0507334	0.0314883	0.0329927	0.0316104	0.0404643	0.0526886	0.028779	0.0268626	0.0258673	0.0298534	0.0301249
1750	-0.0270424	0.0368497	-0.0740126	0.0301478	-0.00141977	0.0494635	-0.0261898	-0.104572	0.109648	-0.0293806	0.00477292	0.0189071	0.120252	0.00769483		0.0421652	0.0409403	0.0551365	0.0479679	0.0336237	0.0365283	0.0353722	0.041027	0.0513632	0.0312674	0.0286548	0.0254821	0.0303425	0.0395346
2250	-0.0234475	0.0357348	-0.0829099	0.0396331	-0.00395214	0.0528899	-0.0367397	-0.104083	0.132108	-0.0140733	0.0163391	0.0139022	0.132587	-0.0199431		0.0473949	0.0427306	0.0567736	0.0491613	0.0360946	0.0348199	0.0396363	0.0377071	0.0527971	0.0293458	0.0269704	0.0233837	0.0320494	0.0395732
2750	-0.0151637	0.0292537	-0.0825508	0.028273	0.0165141	0.0368437	-0.0470327	-0.0875815	0.121103	-0.00360925	0.016887	0.01563	0.0837381	0.000422783		0.0369848	0.0353721	0.0462593	0.0407279	0.0281116	0.0304641	0.0326354	0.0387222	0.0492072	0.0263467	0.022398	0.02319	0.0261751	0.026762
3250	-0.00825349	0.0144325	-0.0772229	0.0435384	0.00560546	0.0254211	-0.0693055	-0.0411711	0.116247	0.00394102	0.0119883	0.0169715	0.0908921	-0.0185846		0.0318078	0.0320856	0.0364941	0.0400293	0.0273925	0.0283667	0.0254373	0.0326959	0.0440585	0.0284966	0.0200372	0.0254316	0.0247748	0.0229597
3750	-0.00566934	0.00648005	-0.0819728	0.0610525	0.0132574	0.000745333	-0.0973838	-0.0400878	0.107294	0.0393303	-0.0294149	0.0422232	0.0978527	-0.0521263		0.0340016	0.0298903	0.034811	0.0387845	0.0259001	0.0263909	0.0274675	0.0290601	0.0434045	0.0269303	0.0225452	0.0264213	0.0226885	0.0251157
4250	-0.00754264	0.00942822	-0.066003	0.0527913	0.00944549	0.00522745	-0.120265	-0.0424644	0.109147	0.0307998	-0.00104773	0.0400635	0.0888143	-0.0744602		0.0375182	0.0303741	0.0371142	0.0417981	0.0294174	0.0276515	0.0285272	0.0283726	0.0436107	0.0243042	0.0230765	0.027761	0.0567546	0.0554311
4750	-0.000628339	0.000473099	-0.04812	0.0488402	0.0103039	-0.0185803	-0.0849889	-0.0342958	0.105828	0.0367137	0.0379353	0.0268586	0.0683442	-0.101155		0.0364526	0.0367163	0.0383252	0.0403384	0.0318283	0.0302289	0.0271183	0.0328697	0.0418549	0.0262179	0.022792	0.026464	0.0611735	0.0631297
5250	0.000606389	-0.00948076	-0.0477422	0.0531433	0.0194943	-0.0383581	-0.050678	-0.0610215	0.112308	0.0367227	0.0333622	0.0560528	0.0540684	-0.130429		0.0345867	0.0343465	0.0383989	0.0371879	0.0323627	0.0301733	0.0231614	0.0313588	0.0469706	0.029052	0.0218478	0.0244435	0.0619488	0.0572463
5750	0.00224255	-0.00411402	-0.0637332	0.0643755	0.0191435	-0.0386271	-0.0448218	-0.0885472	0.149448	0.013665	0.0286463	0.0341409	0.054636	-0.100743		0.0286654	0.0282984	0.0338837	0.0338635	0.0267103	0.0252044	0.0234434	0.027775	0.0476123	0.0257076	0.0197136	0.0230152	0.044011	0.0436036
6250	0.00136276	-0.0106423	-0.0627676	0.0742777	0.00797488	-0.0274019	-0.0662201	-0.0652028	0.117916	0.0345091	0.0185756	0.029287	0.0646652	-0.0847241		0.0300044	0.024948	0.0314972	0.0332072	0.0267994	0.0249556	0.0212532	0.0297522	0.0484986	0.0248606	0.0196797	0.0262317	0.0431203	0.0400214
6750	-0.00181384	-0.00907822	-0.0506461	0.0629794	-0.00845297	-0.0116865	-0.0814171	-0.0334874	0.112008	0.0241159	0.0206158	-0.00808684	0.0504244	-0.0539908		0.0323656	0.0288306	0.0337861	0.0333552	0.0242394	0.0298409	0.0257067	0.0301224	0.0501572	0.0283684	0.0209877	0.0225548	0.034048	0.0367568
7250	0.00714809	-0.0127935	-0.0414523	0.0554953	0.00751007	-0.0519744	-0.0407526	-0.0246168	0.0986783	0.0499618	0.0258445	0.0312667	0.0115562	-0.0994576		0.0282968	0.028453	0.0331699	0.0304235	0.0231379	0.0234125	0.0260759	0.0270904	0.0483609	0.0270573	0.0254227	0.0225625	0.0322482	0.033464
7750	-0.00321499	-0.00112949	-0.0680174	0.0635487	0.011413	-0.0359496	-0.0684027	-0.0439374	0.0838779	0.0707344	0.0130625	0.0550479	0.0022616	-0.0649638		0.0306715	0.0310774	0.0292352	0.0279168	0.0212446	0.0227403	0.0247192	0.0246268	0.0469491	0.0228419	0.0286234	0.0213418	0.0289194	0.0332293
8250	-0.0103095	0.00187626	-0.0664459	0.0567636	0.0255932	-0.0459124	-0.0797853	-0.0594777	0.0765182	0.0417212	0.0373618	0.0592237	0.000468688	-0.0521242		0.0323377	0.0309744	0.0307723	0.0282004	0.0266059	0.0204874	0.0245381	0.0226877	0.041514	0.0235117	0.0301807	0.0231615	0.0269993	0.0308809
8750	-0.00833493	-0.00228363	-0.067549	0.068698	0.00737844	-0.0407371	-0.104279	-0.0375945	0.0893607	0.0455403	0.044555	0.0125766	0.0389529	-0.0816004		0.0294227	0.0284872	0.0281645	0.029153	0.0227508	0.0184601	0.0247652	0.0231694	0.0420753	0.0236362	0.0283683	0.0193941	0.0274966	0.0299658
9250	-0.0130479	-0.0023587	-0.0567848	0.0575062	0.0268909	-0.0382649	-0.0828453	-0.0263537	0.0572991	0.039257	0.0510288	0.0376596	0.024729	-0.0828714		0.0295702	0.0294425	0.0297575	0.029486	0.0205535	0.0203502	0.0266755	0.0228938	0.0432327	0.0208151	0.0272259	0.0174356	0.0239286	0.0305107
9750	-0.00994069	-0.00577167	-0.0662508	0.0642529	0.0247575	-0.0366489	-0.0615959	-0.0336499	0.0835748	0.0523808	0.0596309	0.0354267	0.000650684	-0.0788055		0.0279706	0.0286694	0.0256822	0.0268413	0.0217887	0.0195422	0.0252078	0.0191231	0.0422369	0.0201523	0.0324614	0.0162667	0.0223226	0.0285261
10250	-0.0165182	0.00131844	-0.0793098	0.0624004	0.0268073	-0.02634	-0.0831735	-0.0618889	0.0837322	0.0557372	0.0311124	0.033387	0.00590155	-0.0639437		0.0267736	0.0280531	0.0254091	0.024977	0.019254	0.0219408	0.0213758	0.0190829	0.0421362	0.0180582	0.0180526	0.016125	0.0209149	0.0277195
10750	-0.0209821	0.00610869	-0.0801542	0.0649449	0.0260596	-0.0182387	-0.0962673	-0.0663593	0.0633891	0.0809	0.033835	0.0312795	0.00997723	-0.0522506		0.0263695	0.0287226	0.0251855	0.0279438	0.0190725	0.0229746	0.0221539	0.0178207	0.0437522	0.0198299	0.0185596	0.0164781	0.0208851	0.0268805
11250	-0.0229478	0.0102709	-0.0875082	0.0638662	0.0345312	-0.0171906	-0.07916	-0.07896	0.0831825	0.0630745	0.0638535	0.0400881	0.0171687	-0.0564183		0.0243544	0.0310659	0.0240636	0.0305304	0.0184767	0.0229677	0.021167	0.018478	0.046139	0.0226378	0.0193579	0.015782	0.0229827	0.0262255
11750	-0.0236755	0.0126581	-0.0935997	0.0690663	0.0422965	-0.0151019	-0.0764908	-0.0872716	0.102813	0.0525761	0.0646102	0.0400811	0.032256	-0.040322		0.0234137	0.0308249	0.0233146	0.0292243	0.0167724	0.0250514	0.0208769	0.017755	0.0455456	0.0233121	0.0201829	0.0174026	0.0255618	0.0257525
12250	-0.0228972	0.0123371	-0.0970688	0.0672914	0.0527711	-0.0115102	-0.0656867	-0.103593	0.0938165	0.0491037	0.0598325	0.0404442	0.0157847	-0.0243021		0.0267537	0.0305664	0.0237296	0.027623	0.017196	0.0229748	0.022023	0.0179766	0.0458368	0.0236141	0.0179968	0.0164145	0.0215564	0.025581
12750	-0.0271863	0.0190776	-0.0980796	0.0496568	0.0656074	-0.00041231	-0.0756568	-0.102706	0.090801	0.0528434	0.0650759	0.0552622	0.028104	-0.0132672		0.0274489	0.0301558	0.0277002	0.0277779	0.0196227	0.0230753	0.0210197	0.0185599	0.0451352	0.0239013	0.0198288	0.0192358	0.0192461	0.0264948
13250	-0.0319298	0.0235815	-0.102607	0.0472422	0.0603802	0.0193774	-0.0940026	-0.103826	0.0683463	0.0485589	0.0469779	0.0589315	0.0631568	-0.00891416		0.0272449	0.0301345	0.0263149	0.0283652	0.0225907	0.0255345	0.0190095	0.0186661	0.0466405	0.0236345	0.0181347	0.0213592	0.0191674	0.0264245
13750	-0.041477	0.0330459	-0.10388	0.0406072	0.0544916	0.0224203	-0.0941579	-0.0951701	0.0684504	0.0329657	0.0631869	0.0658267	0.0729893	-0.00643465		0.0267965	0.0322785	0.0307327	0.030765	0.0223789	0.0250393	0.0208137	0.0230821	0.0459435	0.0250428	0.0185231	0.0225498	0.0195523	0.0251839
14250	-0.0379049	0.0271959	-0.101371	0.037173	0.0448661	0.0144793	-0.0933338	-0.0810419	0.0717243	0.0195793	0.0606745	0.0708364	0.0407497	0.00365379		0.0320411	0.035656	0.0370464	0.0320813	0.0243014	0.0284593	0.0210839	0.0256545	0.0452778	0.0250127	0.0186702	0.0203177	0.0237733	0.0230238
14750	-0.0268839	0.00931528	-0.0855037	0.0487848	0.0084689	0.00887425	-0.0916399	-0.0691126	0.0828987	0.0395413	0.0151861	0.0554411	0.0509816	0.0218329		0.0416925	0.0401048	0.037488	0.0393544	0.0297162	0.0306088	0.022279	0.0289302	0.0463498	0.0301533	0.0238663	0.0221242	0.0276802	0.025473
15250	-0.0121206	9.44442e-05	-0.0660231	0.0703489	-0.0311939	0.0183299	-0.0754767	-0.0618195	0.0876139	0.0629759	-0.0278291	0.0203095	0.0450729	0.0231081		0.0476543	0.0436732	0.0426005	0.0456596	0.0284128	0.0338185	0.0246935	0.033316	0.0447776	0.0319552	0.0301145	0.0212502	0.0235239	0.0270198
15750	-0.00271703	-0.00663318	-0.0655589	0.0771092	-0.0490914	0.0370036	-0.0696841	-0.068354	0.0910808	0.0987998	-0.105864	0.0142297	0.0275382	0.0478702		0.0503139	0.0571647	0.0467332	0.0457874	0.0410952	0.0401024	0.0279242	0.029654	0.0516297	0.0388434	0.0313355	0.0293257	0.0280007	0.0308407
16250	-0.0104469	0.00651582	-0.0232884	0.0057966	-0.0214101	0.0420589	-0.0188492	-0.0336449	0.0193154	0.0267065	-0.0787237	0.00338708	0.0809951	0.0118209		0.0553892	0.0661542	0.0508933	0.0534239	0.0482289	0.0478519	0.0414357	0.0335706	0.0512684	0.040093	0.0358935	0.0319269	0.0406987	0.0393761
16750	0.00252234	0.00466248	-0.0587797	0.0274771	-0.0136645	0.0170785	-0.0797356	-0.0433347	0.0679476	0.026127	-0.0256835	-0.0166962	0.00964636	-0.0170577		0.0838089	0.084029	0.0717006	0.0759756	0.0582366	0.0547306	0.0524283	0.0448357	0.0615224	0.0535146	0.0494931	0.0517259	0.0433055	0.0536906
17250	0.00257758	-0.016775	0.00966877	-0.0253139	-0.0388213	0.0141998	0.0297637	-0.0674871	0.145811	-0.018818	0.0376442	0.0543961	-0.0996212	0.0107502		0.0914121	0.0927369	0.0803164	0.0937799	0.0802133	0.0710405	0.055842	0.0564705	0.0720449	0.0691829	0.0498444	0.0696064	0.0548955	0.0563512
17750	0.0219628	-0.0468722	0.0667451	-0.0184631	-0.0666803	-0.0222884	0.012691	0.127617	0.156804	-0.0182321	0.00896749	-0.0901227	-0.227877	0.108309		0.0913492	0.118619	0.0786529	0.101496	0.0836447	0.0743145	0.0586073	0.0658714	0.0615118	0.0641883	0.0676204	0.0658517	0.0854428	0.0895439
18250	0.0959055	-0.0699444	0.12563	0.022353	-0.13883	-0.0505879	0.124011	0.126202	0.120158	-0.177058	-0.0798017	-0.295521	-0.0995373	0.104912		0.130959	0.107752	0.0919126	0.10736	0.0872363	0.0866253	0.079354	0.0678253	0.0659664	0.0690023	0.0693146	0.0591737	0.0684945	0.0933123
18750	0.0468464	-0.0534569	0.0869754	-0.00337476	-0.214439	0.035788	0.0500615	0.0191866	0.0360843	-0.173136	-0.192879	-0.222018	-0.0790027	0.226225		0.114105	0.106298	0.10284	0.0844691	0.0830736	0.0793644	0.0706887	0.0700797	0.0584781	0.0643971	0.0570728	0.0566786	0.0736668	0.0638211
19250	0.0596015	-0.0484081	0.0262726	0.0382129	-0.214833	0.0795808	0.0608553	0.0359141	-0.0323805	0.00757336	-0.236401	-0.139436	0.0375781	0.168044		0.0994587	0.112176	0.111387	0.0877831	0.0785939	0.0790505	0.0786127	0.0573907	0.0557786	0.0605368	0.0665506	0.0852848	0.0669544	0.0721917
19750	0.0396987	-0.0203779	-0.0200567	0.0554583	-0.183467	0.135944	0.0965471	-0.0192546	0.0555527	0.0690962	-0.209653	-0.0675419	0.0689985	0.135231		0.103892	0.104931	0.0925151	0.0846479	0.0740854	0.0824198	0.0766027	0.0703	0.0560717	0.0629118	0.055008	0.070539	0.0690326	0.0730761
20250	0.0115046	-0.0145593	-0.00929967	0.017567	-0.143365	0.134401	0.0897366	-0.0733194	0.0507982	0.0513058	-0.212434	-0.0187288	0.0969447	0.185511		0.089127	0.084507	0.0815207	0.0761727	0.0746526	0.081861	0.0704842	0.0533585	0.0606388	0.066769	0.056327	0.0583283	0.0671241	0.066083
20750	-0.0139013	-0.00261649	-0.036969	0.0250893	-0.154195	0.214197	0.054113	-0.112649	0.050448	0.0554959	-0.207801	-0.0365893	0.179392	0.354115		0.10176	0.103641	0.0944156	0.0846372	0.0777301	0.0966318	0.0781166	0.0684559	0.0659139	0.0487667	0.0625187	0.0561845	0.0663526	0.0877813
21250	-0.0188345	0.00850291	-0.0264092	-0.0120815	-0.113546	0.205273	0.0869887	-0.137276	0.0526686	0.0212489	-0.212007	0.00279885	0.209795	0.33624		0.11042	0.107963	0.103185	0.0813866	0.066113	0.102197	0.0744456	0.0690626	0.0675046	0.0629913	0.0594445	0.0497817	0.0696144	0.0941647
21750	-0.0594428	0.0684459	-0.158599	-0.00934035	-0.0465505	0.141131	-0.0333596	-0.211172	0.207369	-0.0891297	-0.173202	0.0545113	0.146884	0.194419		0.117344	0.114721	0.0980013	0.0795708	0.0783732	0.107341	0.0745473	0.0586123	0.0752343	0.0636052	0.0628487	0.0736681	0.081182	0.0879258
22250	-0.060754	0.0498128	-0.0883518	-0.0554592	-0.0431645	0.0518733	-0.0303434	-0.128029	0.226765	-0.164556	-0.134312	-0.0193872	0.107102	0.153018		0.112303	0.109127	0.0892156	0.077735	0.0671819	0.104768	0.0769164	0.0861485	0.0680453	0.0576207	0.0587132	0.0585383	0.0782492	0.0759927
22750	-0.0361872	0.032169	-0.0574059	-0.0409177	-0.0623794	0.0489096	0.0897131	-0.183736	0.156133	-0.0899482	-0.160592	-0.0295112	0.0731262	0.12439		0.103226	0.110582	0.0975989	0.0772153	0.0772392	0.1062	0.0972119	0.0650349	0.0633276	0.067375	0.0614448	0.0825217	0.0828388	0.0901177
23250	-0.0192602	0.036896	-0.0259845	-0.0288852	-0.0777895	0.0481166	0.114382	-0.170452	0.16261	-0.0891893	-0.117081	0.0356041	0.00512471	0.10465		0.111328	0.11384	0.0909512	0.0969587	0.0880928	0.103055	0.106246	0.0559166	0.0823843	0.0619643	0.0745119	0.085305	0.0903281	0.090478
23750	-0.0418001	0.0407359	-0.0265413	0.0190673	-0.0705865	0.129223	0.0138959	-0.0374661	0.113531	-0.0909854	-0.0432	0.0397853	0.0894799	0.150613		0.109243	0.109514	0.102023	0.0877598	0.0860629	0.0997106	0.107901	0.0680374	0.0827727	0.0623557	0.0677604	0.0870641	0.0829877	0.0866932
24250	-0.079427	0.0484946	-0.0448856	0.0136568	-0.000234937	0.142143	-0.0451233	-0.0569447	0.142024	-0.174759	-0.0016558	0.184058	0.223462	0.0185112		0.102184	0.114126	0.117093	0.099678	0.0877765	0.109764	0.0843557	0.076548	0.0975782	0.0517118	0.0602359	0.0780228	0.0753214	0.089369
24750	-0.0467167	0.00995524	-0.11877	0.00871293	0.0669226	0.090343	-0.13194	-0.166321	0.155359	-0.13271	-0.0251244	0.261985	0.0749303	0.0433731		0.0949534	0.104489	0.10402	0.0852524	0.0829463	0.113441	0.076548	0.0786886	0.101219	0.0595441	0.0600452	0.0846605	0.0684092	0.0824437
25250	-0.0277248	0.0091916	-0.0768676	0.0839453	0.118901	-0.0521828	-0.044615	-0.282073	0.216481	-0.0331735	0.00231004	0.193107	-0.0292733	0.0120844		0.106002	0.135353	0.120758	0.0878574	0.0938182	0.126365	0.0929039	0.0969569	0.0833486	0.0792624	0.0681032	0.0916312	0.0920158	0.0890361
25750	-0.0248527	-0.0369492	-0.0972218	0.153264	0.0493433	-0.0679564	-0.090518	-0.0947763	0.177684	0.0423156	-0.0907952	0.170249	-0.139364	0.046213		0.099007	0.126652	0.103163	0.0998067	0.080571	0.109778	0.0685055	0.112192	0.130794	0.0917006	0.0824811	0.0606827	0.098575	0.0886312
x-axis for charts	1900-01-01 04:00:00	1900-01-01 16:00:00	1900-01-01 01:00:00	1900-01-01 07:00:00	1900-01-01 13:00:00	1900-01-01 19:00:00	23:30:00	1900-01-01 02:30:00	1900-01-01 05:30:00	1900-01-01 08:30:00	1900-01-01 11:30:00	1900-01-01 14:30:00	1900-01-01 17:30:00	1900-01-01 20:30:00
							Legends
							12 hour
							6 hour
							3 hour
