# Supplementary material for: Determining the temporal variability in atmospheric temperature profiles measured using radiosondes and assessment of correction factors for different launch schedules
Source: Copernicus journal article supplement (doi:10.5194/amt-8-463-2015), 2015-01-29
Supplement: Supplementary file 3 [file amt-8-463-2015-supplement-cover-letter.pdf › amt-8-463-2015-supplement-cover-letter.pdf]

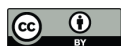

## *Supplement of*

# **Determining the temporal variability in atmospheric temperature profiles measured using radiosondes and assessment of correction factors for different launch schedules**

**D. Butterfield and T. Gardiner**

*Correspondence to:* D. Butterfield ([david.butterfield@npl.co.uk](mailto:david.butterfield@npl.co.uk)) and T. Gardiner ([tom.gardiner@npl.co.uk](mailto:tom.gardiner@npl.co.uk))

- [amt-8-463-2015-supplement-cover-letter.pdf](#)
- [Complete set of charts for Figures 4 and 5 Final.docx](#)
- [Complete set of charts for Figures 4 and 5 Final.pdf](#)
- [Data for Figure 2 Final.xlsx](#)
- [Tables 2A to 2L Final.docx](#)
- [Tables 2A to 2L final.pdf](#)
