# Supplementary material for: Determining the temporal variability in atmospheric temperature profiles measured using radiosondes and assessment of correction factors for different launch schedules
Source: Copernicus journal article supplement (doi:10.5194/amt-8-463-2015), 2015-01-29
Supplement: Supplementary file 3 [file Tables 2A to 2L Final.docx]

| **Altitude = 5km** | **Spring** | **Summer** | **Autumn** | **Winter** |
| --- | --- | --- | --- | --- |
| Mean rate of change, K / hour | -0.030 | -0.052 | -0.043 | -0.029 |
| Std Deviation (1 reading) | 0.293 | 0.218 | 0.294 | 0.356 |
| Std Error (10 readings) | 0.093 | 0.069 | 0.093 | 0.113 |
| St Error (100 readings) | 0.029 | 0.022 | 0.029 | 0.036 |
| **Altitude = 10km** | **Spring** | **Summer** | **Autumn** | **Winter** |
| Mean rate of change, K / hour | -0.042 | -0.051 | -0.028 | -0.019 |
| St Deviation (1 reading) | 0.324 | 0.294 | 0.316 | 0.370 |
| St Error (10 readings) | 0.102 | 0.093 | 0.100 | 0.117 |
| St Error (100 readings) | 0.032 | 0.029 | 0.032 | 0.037 |
| **Altitude = 15km** | **Spring** | **Summer** | **Autumn** | **Winter** |
| Mean rate of change, K / hour | -0.013 | -0.017 | -0.014 | -0.045 |
| Std Deviation (1 reading) | 0.188 | 0.185 | 0.221 | 0.237 |
| Std Error (10 readings) | 0.059 | 0.058 | 0.070 | 0.075 |
| Std Error (100 readings) | 0.019 | 0.018 | 0.022 | 0.024 |
| **Altitude = 20km** | **Spring** | **Summer** | **Autumn** | **Winter** |
| Mean rate of change, K / hour | -0.024 | -0.039 | -0.012 | -0.059 |
| Std Deviation (1 reading) | 0.202 | 0.175 | 0.203 | 0.246 |
| Std Error (10 readings) | 0.064 | 0.055 | 0.064 | 0.078 |
| Std Error (100 readings) | 0.020 | 0.017 | 0.020 | 0.025 |

Table 2a Lindenberg 1999 – 2008. Mean rate of change in temperature between launches at 01:00 and 07:00 hours, along with standard deviation of a single measurement and standard error with increased number of measurements for 4 seasons.

| **Altitude = 5km** | **Spring** | **Summer** | **Autumn** | **Winter** |
| --- | --- | --- | --- | --- |
| Mean rate of change, K / hour | 0.020 | 0.045 | 0.022 | 0.003 |
| Std Deviation (1 reading) | 0.295 | 0.207 | 0.329 | 0.379 |
| Std Error (10 readings) | 0.093 | 0.066 | 0.104 | 0.120 |
| St Error (100 readings) | 0.030 | 0.021 | 0.033 | 0.038 |
| **Altitude = 10km** | **Spring** | **Summer** | **Autumn** | **Winter** |
| Mean rate of change, K / hour | 0.037 | 0.017 | 0.011 | 0.004 |
| St Deviation (1 reading) | 0.325 | 0.300 | 0.312 | 0.368 |
| St Error (10 readings) | 0.103 | 0.095 | 0.099 | 0.116 |
| St Error (100 readings) | 0.033 | 0.030 | 0.031 | 0.037 |
| **Altitude = 15km** | **Spring** | **Summer** | **Autumn** | **Winter** |
| Mean rate of change, K / hour | 0.006 | 0.016 | -0.005 | 0.030 |
| Std Deviation (1 reading) | 0.184 | 0.182 | 0.221 | 0.241 |
| Std Error (10 readings) | 0.058 | 0.058 | 0.070 | 0.076 |
| Std Error (100 readings) | 0.018 | 0.018 | 0.022 | 0.024 |
| **Altitude = 20km** | **Spring** | **Summer** | **Autumn** | **Winter** |
| Mean rate of change, K / hour | 0.025 | 0.074 | -0.003 | 0.035 |
| Std Deviation (1 reading) | 0.207 | 0.179 | 0.213 | 0.275 |
| Std Error (10 readings) | 0.065 | 0.057 | 0.067 | 0.087 |
| Std Error (100 readings) | 0.021 | 0.018 | 0.021 | 0.027 |

Table 2b Lindenberg 1999 – 2008. Mean rate of change in temperature between launches at 07:00 and 13:00 hours, along with standard deviation of a single measurement and standard error with increased number of measurements for 4 seasons.

| **Altitude = 5km** | **Spring** | **Summer** | **Autumn** | **Winter** |
| --- | --- | --- | --- | --- |
| Mean rate of change, K / hour | 0.036 | 0.040 | 0.010 | 0.013 |
| Std Deviation (1 reading) | 0.265 | 0.219 | 0.304 | 0.372 |
| Std Error (10 readings) | 0.084 | 0.069 | 0.096 | 0.118 |
| St Error (100 readings) | 0.026 | 0.022 | 0.030 | 0.037 |
| **Altitude = 10km** | **Spring** | **Summer** | **Autumn** | **Winter** |
| Mean rate of change, K / hour | 0.011 | 0.027 | 0.023 | 0.000 |
| St Deviation (1 reading) | 0.305 | 0.280 | 0.337 | 0.368 |
| St Error (10 readings) | 0.097 | 0.088 | 0.107 | 0.116 |
| St Error (100 readings) | 0.031 | 0.028 | 0.034 | 0.037 |
| **Altitude = 15km** | **Spring** | **Summer** | **Autumn** | **Winter** |
| Mean rate of change, K / hour | 0.006 | -0.005 | 0.004 | -0.003 |
| Std Deviation (1 reading) | 0.182 | 0.191 | 0.215 | 0.235 |
| Std Error (10 readings) | 0.058 | 0.060 | 0.068 | 0.074 |
| Std Error (100 readings) | 0.018 | 0.019 | 0.021 | 0.023 |
| **Altitude = 20km** | **Spring** | **Summer** | **Autumn** | **Winter** |
| Mean rate of change, K / hour | 0.031 | -0.033 | 0.032 | 0.024 |
| Std Deviation (1 reading) | 0.199 | 0.175 | 0.202 | 0.270 |
| Std Error (10 readings) | 0.063 | 0.055 | 0.064 | 0.085 |
| Std Error (100 readings) | 0.020 | 0.017 | 0.020 | 0.027 |

Table 2c Lindenberg 1999 – 2008. Mean rate of change in temperature between launches at 13:00 and 19:00 hours, along with standard deviation of a single measurement and standard error with increased number of measurements for 4 seasons.

| **Altitude = 5km** | **Spring** | **Summer** | **Autumn** | **Winter** |
| --- | --- | --- | --- | --- |
| Mean rate of change, K / hour | -0.001 | -0.024 | -0.006 | 0.001 |
| Std Deviation (1 reading) | 0.264 | 0.201 | 0.293 | 0.375 |
| Std Error (10 readings) | 0.084 | 0.064 | 0.093 | 0.119 |
| St Error (100 readings) | 0.026 | 0.020 | 0.029 | 0.037 |
| **Altitude = 10km** | **Spring** | **Summer** | **Autumn** | **Winter** |
| Mean rate of change, K / hour | 0.001 | 0.002 | -0.014 | 0.009 |
| St Deviation (1 reading) | 0.303 | 0.274 | 0.309 | 0.363 |
| St Error (10 readings) | 0.096 | 0.087 | 0.098 | 0.115 |
| St Error (100 readings) | 0.030 | 0.027 | 0.031 | 0.036 |
| **Altitude = 15km** | **Spring** | **Summer** | **Autumn** | **Winter** |
| Mean rate of change, K / hour | 0.012 | 0.005 | 0.011 | 0.018 |
| Std Deviation (1 reading) | 0.173 | 0.190 | 0.214 | 0.241 |
| Std Error (10 readings) | 0.055 | 0.060 | 0.068 | 0.076 |
| Std Error (100 readings) | 0.017 | 0.019 | 0.021 | 0.024 |
| **Altitude = 20km** | **Spring** | **Summer** | **Autumn** | **Winter** |
| Mean rate of change, K / hour | -0.021 | -0.002 | -0.036 | 0.009 |
| Std Deviation (1 reading) | 0.188 | 0.178 | 0.200 | 0.243 |
| Std Error (10 readings) | 0.060 | 0.056 | 0.063 | 0.077 |
| Std Error (100 readings) | 0.019 | 0.018 | 0.020 | 0.024 |

Table 2d Lindenberg 1999 – 2008. Mean rate of change in temperature between launches at 19:00 and 01:00 hours, along with standard deviation of a single measurement and standard error with increased number of measurements for 4 seasons.

| **Altitude = 5km** | **Spring** | **Summer** | **Autumn** | **Winter** |
| --- | --- | --- | --- | --- |
| Mean rate of change, K / hour | -0.050 | -0.060 | -0.030 | 0.004 |
| Std Deviation (1 reading) | 0.215 | 0.216 | 0.261 | 0.362 |
| Std Error (10 readings) | 0.068 | 0.068 | 0.083 | 0.114 |
| St Error (100 readings) | 0.022 | 0.022 | 0.026 | 0.036 |
| **Altitude = 10km** | **Spring** | **Summer** | **Autumn** | **Winter** |
| Mean rate of change, K / hour | -0.017 | -0.046 | -0.068 | -0.018 |
| St Deviation (1 reading) | 0.287 | 0.274 | 0.286 | 0.359 |
| St Error (10 readings) | 0.091 | 0.087 | 0.090 | 0.113 |
| St Error (100 readings) | 0.029 | 0.027 | 0.029 | 0.036 |
| **Altitude = 15km** | **Spring** | **Summer** | **Autumn** | **Winter** |
| Mean rate of change, K / hour | -0.014 | -0.022 | -0.034 | -0.009 |
| Std Deviation (1 reading) | 0.178 | 0.201 | 0.208 | 0.231 |
| Std Error (10 readings) | 0.056 | 0.064 | 0.066 | 0.073 |
| Std Error (100 readings) | 0.018 | 0.020 | 0.021 | 0.023 |
| **Altitude = 20km** | **Spring** | **Summer** | **Autumn** | **Winter** |
| Mean rate of change, K / hour | -0.009 | -0.009 | -0.009 | -0.048 |
| Std Deviation (1 reading) | 0.187 | 0.176 | 0.202 | 0.239 |
| Std Error (10 readings) | 0.059 | 0.056 | 0.064 | 0.076 |
| Std Error (100 readings) | 0.019 | 0.018 | 0.020 | 0.024 |

Table 2e Lindenberg 2009 – 2012. Mean rate of change in temperature between launches at 01:00 and 07:00 hours, along with standard deviation of a single measurement and standard error with increased number of measurements for 4 seasons.

| **Altitude = 5km** | **Spring** | **Summer** | **Autumn** | **Winter** |
| --- | --- | --- | --- | --- |
| Mean rate of change, K / hour | 0.046 | 0.032 | 0.013 | 0.046 |
| Std Deviation (1 reading) | 0.253 | 0.219 | 0.270 | 0.253 |
| Std Error (10 readings) | 0.080 | 0.069 | 0.086 | 0.080 |
| St Error (100 readings) | 0.025 | 0.022 | 0.027 | 0.025 |
| **Altitude = 10km** | **Spring** | **Summer** | **Autumn** | **Winter** |
| Mean rate of change, K / hour | 0.014 | -0.007 | 0.041 | -0.008 |
| St Deviation (1 reading) | 0.269 | 0.249 | 0.285 | 0.350 |
| St Error (10 readings) | 0.085 | 0.079 | 0.090 | 0.111 |
| St Error (100 readings) | 0.027 | 0.025 | 0.028 | 0.035 |
| **Altitude = 15km** | **Spring** | **Summer** | **Autumn** | **Winter** |
| Mean rate of change, K / hour | 0.027 | -0.010 | 0.027 | 0.027 |
| Std Deviation (1 reading) | 0.169 | 0.199 | 0.199 | 0.169 |
| Std Error (10 readings) | 0.054 | 0.063 | 0.063 | 0.054 |
| Std Error (100 readings) | 0.017 | 0.020 | 0.020 | 0.017 |
| **Altitude = 20km** | **Spring** | **Summer** | **Autumn** | **Winter** |
| Mean rate of change, K / hour | 0.032 | 0.033 | 0.011 | 0.076 |
| Std Deviation (1 reading) | 0.184 | 0.167 | 0.186 | 0.255 |
| Std Error (10 readings) | 0.058 | 0.053 | 0.059 | 0.081 |
| Std Error (100 readings) | 0.018 | 0.017 | 0.019 | 0.026 |

Table 2f Lindenberg 2009 – 2012. Mean rate of change in temperature between launches at 07:00 and 13:00 hours, along with standard deviation of a single measurement and standard error with increased number of measurements for 4 seasons.

| **Altitude = 5km** | **Spring** | **Summer** | **Autumn** | **Winter** |
| --- | --- | --- | --- | --- |
| Mean rate of change, K / hour | 0.047 | -0.038 | 0.017 | 0.004 |
| Std Deviation (1 reading) | 0.271 | 0.237 | 0.294 | 0.303 |
| Std Error (10 readings) | 0.086 | 0.075 | 0.093 | 0.096 |
| St Error (100 readings) | 0.027 | 0.024 | 0.029 | 0.030 |
| **Altitude = 10km** | **Spring** | **Summer** | **Autumn** | **Winter** |
| Mean rate of change, K / hour | 0.010 | 0.073 | -0.017 | -0.011 |
| St Deviation (1 reading) | 0.286 | 0.268 | 0.295 | 0.293 |
| St Error (10 readings) | 0.091 | 0.085 | 0.093 | 0.093 |
| St Error (100 readings) | 0.029 | 0.027 | 0.030 | 0.029 |
| **Altitude = 15km** | **Spring** | **Summer** | **Autumn** | **Winter** |
| Mean rate of change, K / hour | 0.020 | 0.035 | 0.011 | -0.038 |
| Std Deviation (1 reading) | 0.167 | 0.190 | 0.192 | 0.210 |
| Std Error (10 readings) | 0.053 | 0.060 | 0.061 | 0.066 |
| Std Error (100 readings) | 0.017 | 0.019 | 0.019 | 0.021 |
| **Altitude = 20km** | **Spring** | **Summer** | **Autumn** | **Winter** |
| Mean rate of change, K / hour | 0.020 | 0.023 | 0.009 | -0.024 |
| Std Deviation (1 reading) | 0.183 | 0.176 | 0.209 | 0.243 |
| Std Error (10 readings) | 0.058 | 0.056 | 0.066 | 0.077 |
| Std Error (100 readings) | 0.018 | 0.018 | 0.021 | 0.024 |

Table 2g Lindenberg 2009 – 2012. Mean rate of change in temperature between launches at 13:00 and 19:00 hours, along with standard deviation of a single measurement and standard error with increased number of measurements for 4 seasons.

| **Altitude = 5km** | **Spring** | **Summer** | **Autumn** | **Winter** |
| --- | --- | --- | --- | --- |
| Mean rate of change, K / hour | -0.034 | -0.038 | -0.033 | -0.014 |
| Std Deviation (1 reading) | 0.231 | 0.247 | 0.269 | 0.406 |
| Std Error (10 readings) | 0.073 | 0.078 | 0.085 | 0.128 |
| St Error (100 readings) | 0.023 | 0.025 | 0.027 | 0.041 |
| **Altitude = 10km** | **Spring** | **Summer** | **Autumn** | **Winter** |
| Mean rate of change, K / hour | -0.004 | -0.055 | -0.006 | 0.060 |
| St Deviation (1 reading) | 0.272 | 0.285 | 0.273 | 0.378 |
| St Error (10 readings) | 0.086 | 0.090 | 0.086 | 0.119 |
| St Error (100 readings) | 0.027 | 0.028 | 0.027 | 0.038 |
| **Altitude = 15km** | **Spring** | **Summer** | **Autumn** | **Winter** |
| Mean rate of change, K / hour | -0.027 | -0.028 | 0.005 | -0.009 |
| Std Deviation (1 reading) | 0.168 | 0.193 | 0.202 | 0.226 |
| Std Error (10 readings) | 0.053 | 0.061 | 0.064 | 0.071 |
| Std Error (100 readings) | 0.017 | 0.019 | 0.020 | 0.023 |
| **Altitude = 20km** | **Spring** | **Summer** | **Autumn** | **Winter** |
| Mean rate of change, K / hour | -0.023 | -0.062 | -0.032 | 0.001 |
| Std Deviation (1 reading) | 0.176 | 0.185 | 0.200 | 0.248 |
| Std Error (10 readings) | 0.056 | 0.059 | 0.063 | 0.078 |
| Std Error (100 readings) | 0.018 | 0.019 | 0.020 | 0.025 |

Table 2h Lindenberg 2009 – 2012. Mean rate of change in temperature between launches at 19:00 and 01:00 hours, along with standard deviation of a single measurement and standard error with increased number of measurements for 4 seasons.

| **Altitude = 5km** | **Spring** | **Summer** | **Autumn** | **Winter** |
| --- | --- | --- | --- | --- |
| Mean rate of change, K / hour | -0.060 | -0.088 | -0.019 | -0.003 |
| Std Deviation (1 reading) | 0.294 | 0.180 | 0.289 | 0.386 |
| Std Error (10 readings) | 0.093 | 0.057 | 0.091 | 0.122 |
| St Error (100 readings) | 0.029 | 0.018 | 0.029 | 0.039 |
| **Altitude = 10km** | **Spring** | **Summer** | **Autumn** | **Winter** |
| Mean rate of change, K / hour | -0.070 | -0.068 | -0.048 | -0.068 |
| St Deviation (1 reading) | 0.305 | 0.161 | 0.253 | 0.353 |
| St Error (10 readings) | 0.096 | 0.051 | 0.080 | 0.112 |
| St Error (100 readings) | 0.030 | 0.016 | 0.025 | 0.035 |
| **Altitude = 15km** | **Spring** | **Summer** | **Autumn** | **Winter** |
| Mean rate of change, K / hour | -0.003 | 0.019 | -0.004 | -0.014 |
| Std Deviation (1 reading) | 0.281 | 0.254 | 0.269 | 0.310 |
| Std Error (10 readings) | 0.089 | 0.080 | 0.085 | 0.098 |
| Std Error (100 readings) | 0.028 | 0.025 | 0.027 | 0.031 |
| **Altitude = 20km** | **Spring** | **Summer** | **Autumn** | **Winter** |
| Mean rate of change, K / hour | 0.003 | 0.038 | 0.022 | -0.020 |
| Std Deviation (1 reading) | 0.309 | 0.279 | 0.247 | 0.270 |
| Std Error (10 readings) | 0.098 | 0.088 | 0.078 | 0.085 |
| Std Error (100 readings) | 0.031 | 0.028 | 0.025 | 0.027 |

Table 2i Southern Great Plains 2006 – 2012. Mean rate of change in temperature between launches at 00:00 and 06:00 hours, along with standard deviation of a single measurement and standard error with increased number of measurements for 4 seasons.

| **Altitude = 5km** | **Spring** | **Summer** | **Autumn** | **Winter** |
| --- | --- | --- | --- | --- |
| Mean rate of change, K / hour | 0.038 | 0.060 | 0.012 | 0.025 |
| Std Deviation (1 reading) | 0.279 | 0.173 | 0.255 | 0.405 |
| Std Error (10 readings) | 0.088 | 0.055 | 0.081 | 0.128 |
| St Error (100 readings) | 0.028 | 0.017 | 0.025 | 0.041 |
| **Altitude = 10km** | **Spring** | **Summer** | **Autumn** | **Winter** |
| Mean rate of change, K / hour | 0.024 | 0.008 | -0.005 | 0.015 |
| St Deviation (1 reading) | 0.266 | 0.167 | 0.232 | 0.344 |
| St Error (10 readings) | 0.084 | 0.053 | 0.073 | 0.109 |
| St Error (100 readings) | 0.027 | 0.017 | 0.023 | 0.034 |
| **Altitude = 15km** | **Spring** | **Summer** | **Autumn** | **Winter** |
| Mean rate of change, K / hour | -0.003 | 0.008 | 0.011 | 0.027 |
| Std Deviation (1 reading) | 0.290 | 0.247 | 0.255 | 0.280 |
| Std Error (10 readings) | 0.092 | 0.078 | 0.080 | 0.089 |
| Std Error (100 readings) | 0.029 | 0.025 | 0.025 | 0.028 |
| **Altitude = 20km** | **Spring** | **Summer** | **Autumn** | **Winter** |
| Mean rate of change, K / hour | 0.034 | 0.032 | -0.004 | 0.028 |
| Std Deviation (1 reading) | 0.274 | 0.265 | 0.247 | 0.275 |
| Std Error (10 readings) | 0.087 | 0.084 | 0.078 | 0.087 |
| Std Error (100 readings) | 0.027 | 0.026 | 0.025 | 0.027 |

Table 2j Southern Great Plains 2006 – 2012. Mean rate of change in temperature between launches at 06:00 and 12:00 hours, along with standard deviation of a single measurement and standard error with increased number of measurements for 4 seasons.

| **Altitude = 5km** | **Spring** | **Summer** | **Autumn** | **Winter** |
| --- | --- | --- | --- | --- |
| Mean rate of change, K / hour | 0.081 | 0.093 | 0.036 | 0.052 |
| Std Deviation (1 reading) | 0.316 | 0.326 | 0.285 | 0.425 |
| Std Error (10 readings) | 0.100 | 0.103 | 0.090 | 0.134 |
| St Error (100 readings) | 0.032 | 0.033 | 0.028 | 0.043 |
| **Altitude = 10km** | **Spring** | **Summer** | **Autumn** | **Winter** |
| Mean rate of change, K / hour | 0.044 | 0.073 | 0.033 | 0.010 |
| St Deviation (1 reading) | 0.297 | 0.319 | 0.254 | 0.369 |
| St Error (10 readings) | 0.094 | 0.101 | 0.080 | 0.117 |
| St Error (100 readings) | 0.030 | 0.032 | 0.025 | 0.037 |
| **Altitude = 15km** | **Spring** | **Summer** | **Autumn** | **Winter** |
| Mean rate of change, K / hour | -0.046 | 0.001 | -0.024 | -0.038 |
| Std Deviation (1 reading) | 0.261 | 0.326 | 0.257 | 0.290 |
| Std Error (10 readings) | 0.082 | 0.103 | 0.081 | 0.092 |
| Std Error (100 readings) | 0.026 | 0.033 | 0.026 | 0.029 |
| **Altitude = 20km** | **Spring** | **Summer** | **Autumn** | **Winter** |
| Mean rate of change, K / hour | -0.025 | -0.047 | -0.019 | -0.015 |
| Std Deviation (1 reading) | 0.260 | 0.284 | 0.245 | 0.281 |
| Std Error (10 readings) | 0.082 | 0.090 | 0.077 | 0.089 |
| Std Error (100 readings) | 0.026 | 0.028 | 0.024 | 0.028 |

Table 2k Southern Great Plains 2006 – 2012. Mean rate of change in temperature between launches at 12:00 and 18:00 hours, along with standard deviation of a single measurement and standard error with increased number of measurements for 4 seasons.

| **Altitude = 5km** | **Spring** | **Summer** | **Autumn** | **Winter** |
| --- | --- | --- | --- | --- |
| Mean rate of change, K / hour | -0.025 | -0.058 | -0.049 | -0.047 |
| Std Deviation (1 reading) | 0.288 | 0.340 | 0.286 | 0.420 |
| Std Error (10 readings) | 0.091 | 0.108 | 0.090 | 0.133 |
| St Error (100 readings) | 0.029 | 0.034 | 0.029 | 0.042 |
| **Altitude = 10km** | **Spring** | **Summer** | **Autumn** | **Winter** |
| Mean rate of change, K / hour | -0.001 | -0.004 | -0.005 | 0.009 |
| St Deviation (1 reading) | 0.302 | 0.326 | 0.259 | 0.396 |
| St Error (10 readings) | 0.095 | 0.103 | 0.082 | 0.125 |
| St Error (100 readings) | 0.030 | 0.033 | 0.026 | 0.040 |
| **Altitude = 15km** | **Spring** | **Summer** | **Autumn** | **Winter** |
| Mean rate of change, K / hour | 0.020 | -0.041 | 0.020 | 0.020 |
| Std Deviation (1 reading) | 0.286 | 0.332 | 0.253 | 0.310 |
| Std Error (10 readings) | 0.090 | 0.105 | 0.080 | 0.098 |
| Std Error (100 readings) | 0.029 | 0.033 | 0.025 | 0.031 |
| **Altitude = 20km** | **Spring** | **Summer** | **Autumn** | **Winter** |
| Mean rate of change, K / hour | -0.006 | -0.029 | -0.003 | 0.005 |
| Std Deviation (1 reading) | 0.272 | 0.309 | 0.245 | 0.270 |
| Std Error (10 readings) | 0.086 | 0.098 | 0.078 | 0.085 |
| Std Error (100 readings) | 0.027 | 0.031 | 0.025 | 0.027 |

Table 2l Southern Great Plains 2006 – 2012. Mean rate of change in temperature between launches at 18:00 and 00:00 hours, along with standard deviation of a single measurement and standard error with increased number of measurements for 4 seasons.
